# Supplementary material for: Transcriptional Responses of Copper-Transport-Related Genes ctr1, ctr2 and atox1 and Their Roles in the Regulation of Cu Homeostasis in Yellow Catfish Pelteobagrus fulvidraco
Source: MDPI journal article supplement (doi:10.3390/ijms232012243), 2022-10-13
Supplement: s1 [file s1]

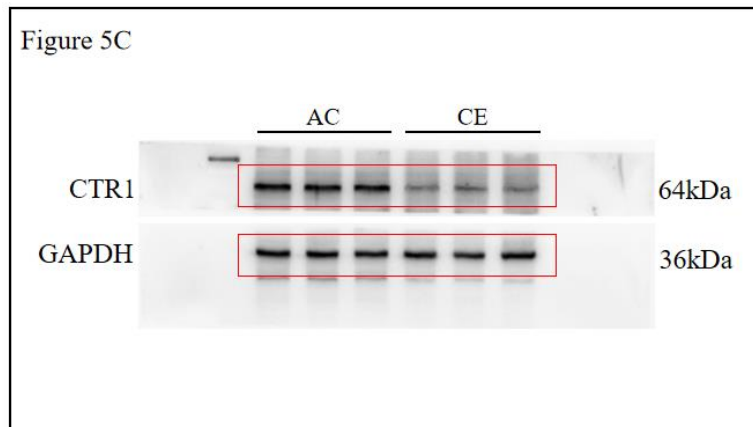

**Western Blotting protein original Figure 5C.**  
**Full scans of uncropped blots presented in the paper. Red boxes indicate the cropped regions. Molecular weight is indicated in kDa.**

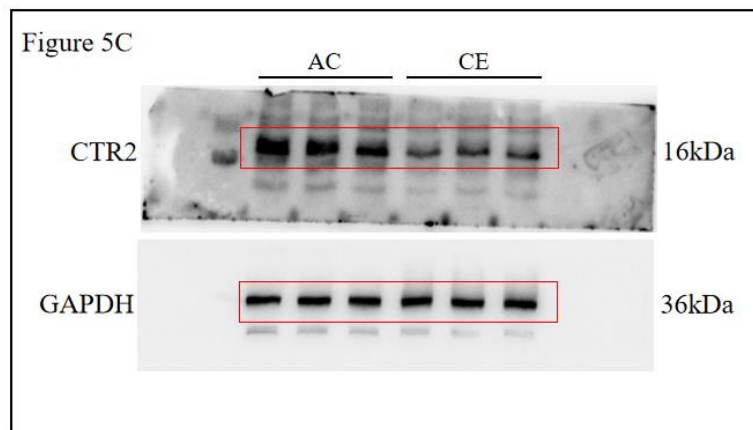

**Western Blotting protein original Figure 5C.**  
**Full scans of uncropped blots presented in the paper. Red boxes indicate the cropped regions. Molecular weight is indicated in kDa.**

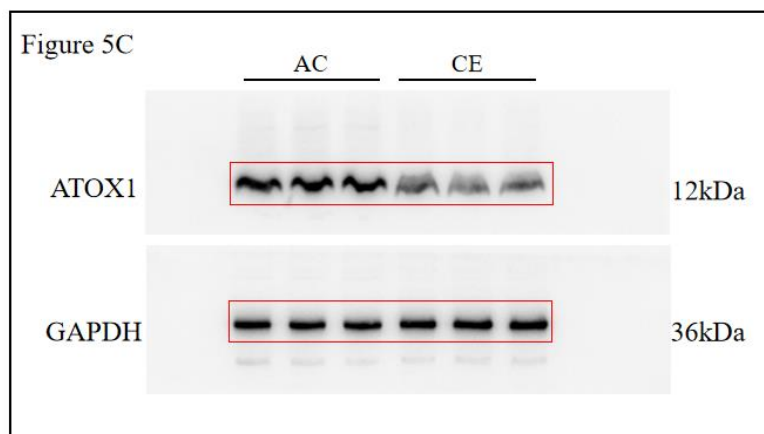

**Western Blotting protein original Figure 5C.**  
**Full scans of uncropped blots presented in the paper. Red boxes indicate the cropped regions. Molecular weight is indicated in kDa.**

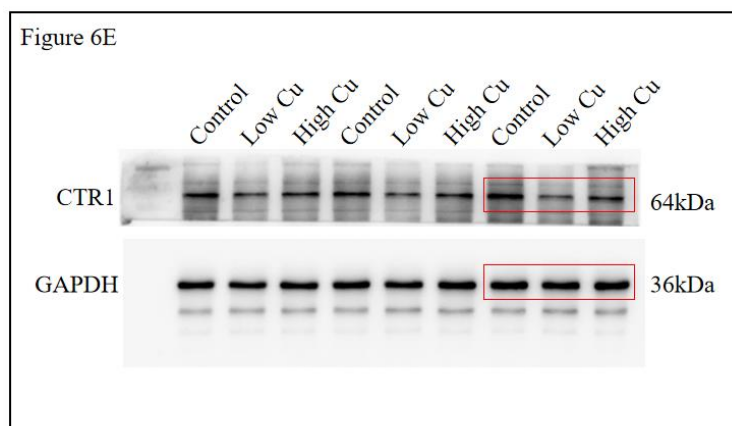

**Western Blotting protein original Figure 6E.**

**Full scans of uncropped blots presented in the paper. Red boxes indicate the cropped regions. Molecular weight is indicated in kDa.**

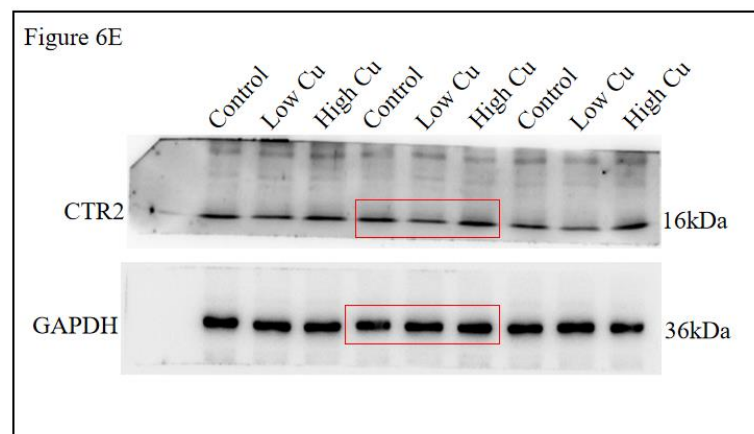

**Western Blotting protein original Figure 6E.**

**Full scans of uncropped blots presented in the paper. Red boxes indicate the cropped regions. Molecular weight is indicated in kDa.**

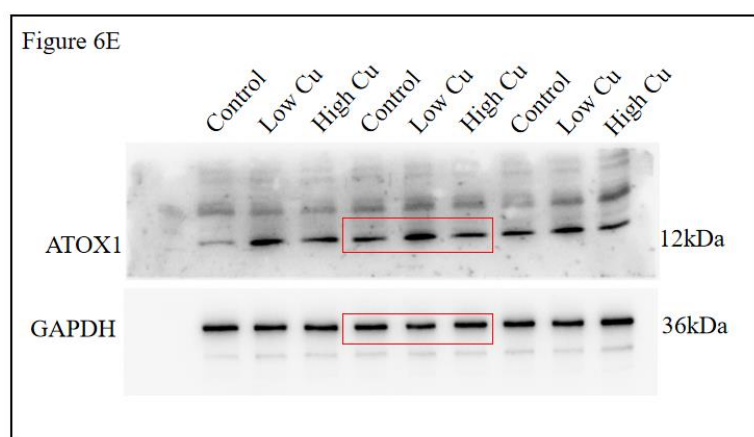

**Western Blotting protein original Figure 6E.**

**Full scans of uncropped blots presented in the paper. Red boxes indicate the cropped regions. Molecular weight is indicated in kDa.**

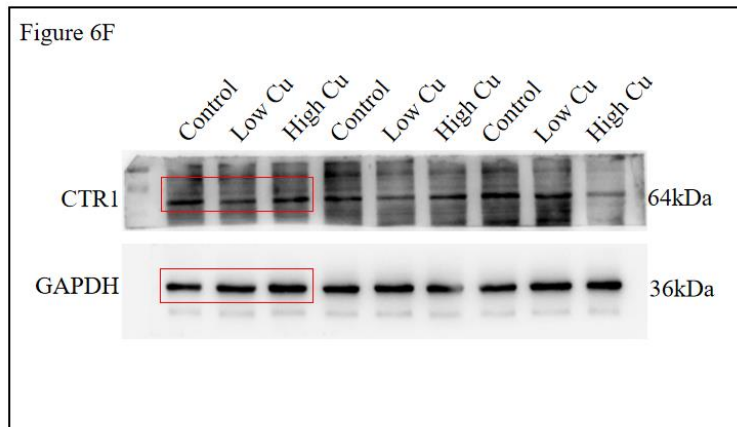

**Western Blotting protein original Figure 6F.**

**Full scans of uncropped blots presented in the paper. Red boxes indicate the cropped regions. Molecular weight is indicated in kDa.**

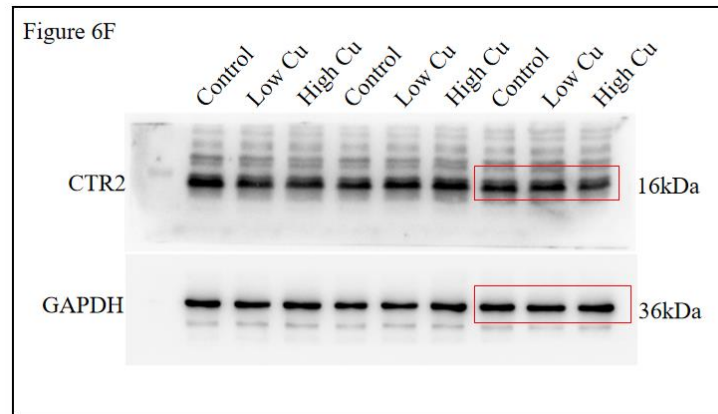

**Western Blotting protein original Figure 6F.**

**Full scans of uncropped blots presented in the paper. Red boxes indicate the cropped regions. Molecular weight is indicated in kDa.**

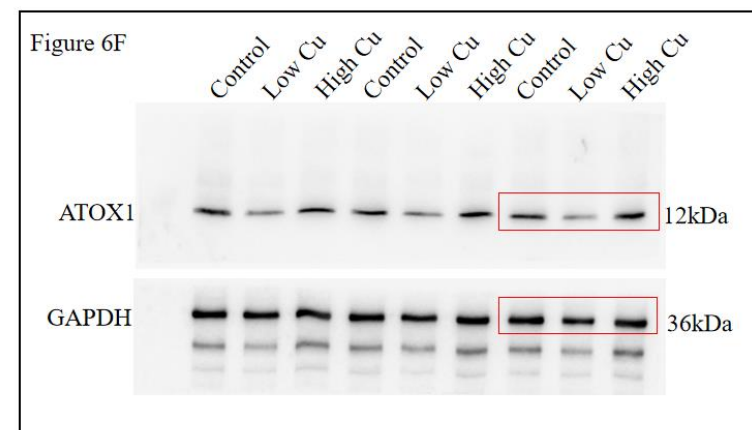

**Western Blotting protein original Figure 6F.**

**Full scans of uncropped blots presented in the paper. Red boxes indicate the cropped regions. Molecular weight is indicated in kDa.**
