# Supplementary material for: Transcriptional Responses of Copper-Transport-Related Genes ctr1, ctr2 and atox1 and Their Roles in the Regulation of Cu Homeostasis in Yellow Catfish Pelteobagrus fulvidraco
Source: MDPI journal article supplement (doi:10.3390/ijms232012243), 2022-10-13
Supplement: s1 [file s1]

**Table S1.** Primers used for the cloning of *ctr1*, *ctr2* and *atox1* promoters in yellow catfish.

| Genes        | Forward primer (5'-3')   | Reverse primer (5'-3')    |
|--------------|--------------------------|---------------------------|
| <i>ctr1</i>  | TGTGGAGCGACTTGTGTGTGGG   | GACGAGGTCCTGACGGCTACCGGC  |
| <i>ctr2</i>  | CCCAAACGCAATTAAAAATGTTGA | TTATTATATAATCCAGCTACAGCTT |
| <i>atox1</i> | TACAAATATTAACCAGTATTTA   | AAGAAGAAGAAAAAAGACACT     |

**Table S2.** Primers used for 5'-deletion plasmids construction of *ctr1*, *ctr2* and *atox1* promoters in yellow catfish

| Genes        | Primers       | Forward primer (5'-3')                                         | Reverse primer (5'-3')                                  |
|--------------|---------------|----------------------------------------------------------------|---------------------------------------------------------|
| <i>ctr1</i>  | pGl3-470/+57  | ctatcgataggtaccgagctcGACTACTTA<br>CTATGTCCTTAGCCCTGTC          | cagtaccggaatgccaagcttGACGAGG<br>TCCTGACGGCTACC          |
|              | pGl3-796/+57  | ctatcgataggtaccgagctcTCCACAGA<br>AGCAGTTTTCAGTCATT             | cagtaccggaatgccaagcttGACGAGG<br>TCCTGACGGCTACC          |
|              | pGl3-1039/+57 | ctatcgataggtaccgagctcAGTGCTGT<br>GGTGCTGGTGAAG                 | cagtaccggaatgccaagcttGACGAGG<br>TCCTGACGGCTACC          |
|              | pGl3-1359/+57 | ctatcgataggtaccgagctcTGTGGAGC<br>GACTTGTGTGTGG                 | cagtaccggaatgccaagcttGACGAGG<br>TCCTGACGGCTACC          |
| <i>ctr2</i>  | pGl3-522/+43  | ctatcgataggtaccgagctcGTCAAATT<br>GCCGAAATACTCCAT               | cagtaccggaatgccaagcttTTATTATAT<br>AATCCAGCTACAGCTTTGTCC |
|              | pGl3-1019/+43 | ctatcgataggtaccgagctcCAACAGGC<br>AGCAGCACCATA                  | cagtaccggaatgccaagcttTTATTATAT<br>AATCCAGCTACAGCTTTGTCC |
|              | pGl3-1557/+43 | ctatcgataggtaccgagctcCGTCACTC<br>TGTACTCAGGGAAGG               | cagtaccggaatgccaagcttTTATTATAT<br>AATCCAGCTACAGCTTTGTCC |
|              | pGl3-1842/+43 | ctatcgataggtaccgagctcCCCAAACG<br>CAATTAAAAATGTTG               | cagtaccggaatgccaagcttTTATTATAT<br>AATCCAGCTACAGCTTTGTCC |
| <i>atox1</i> | pGl3-649/+43  | ctatcgataggtaccgagctcTCAGCTAG<br>TTCAGCGTGCAGAT                | cagtaccggaatgccaagcttAAGAAGA<br>AGAAAAAAGACACTCGG       |
|              | pGl3-1088/+43 | ctatcgataggtaccgagctcCATTGACCT<br>GCATATGGTTCATG               | cagtaccggaatgccaagcttAAGAAGA<br>AGAAAAAAGACACTCGG       |
|              | pGl3-1592/+43 | ctatcgataggtaccgagctcGAAAGTTG<br>GATCAAAATATATCACAAATC         | cagtaccggaatgccaagcttAAGAAGA<br>AGAAAAAAGACACTCGG       |
|              | pGl3-1825/+43 | ctatcgataggtaccgagctcTACAAATAT<br>TAACCAGTATTTATATGACAGT<br>GG | cagtaccggaatgccaagcttAAGAAGA<br>AGAAAAAAGACACTCGG       |

**Table S3.** Primers used for site-mutation analysis

| Genes        | Primers                 | Forward primer (5'-3')                                   | Reverse primer (5'-3')                                           |
|--------------|-------------------------|----------------------------------------------------------|------------------------------------------------------------------|
| <i>ctr1</i>  | Mut-ctr1-N<br>RF2(1)    | gttgacagtcagtagcagcATAACAGGGC<br>CGTGTTATTAAAACA         | ctgctactgactgtcaacattACACACCTG<br>CTAACCTGGAGTGT                 |
|              | Mut-ctr1-N<br>RF2(2)    | aaatcagaagcctggtgtgagGAACAGTG<br>CTGTGGTGCTGGT           | caccaggettctgatttgcaaGTTACAGGT<br>AATATGACATCTATACAATATTA<br>AAC |
|              | Mut-ctr1-S<br>REBP1(1)  | atcccagtggtcacagtttagTCACGAGGG<br>ATCGTTTTTTTTT          | aactgtgaccactgggatgtggaGCGACTT<br>GTGTGTGGGTGACC                 |
|              | Mut-ctr1-S<br>REBP1(2)  | ccctccttgataagtaataagCCAGACGA<br>TGTAACCTCTATTCTTATTTCC  | tgacttatcaaggagggAGAAAGATCAC<br>ATGACCAGTTTAGTCA                 |
|              | Mut-ctr1-S<br>REBP1(3)  | accgacatagcgattgtcTGAACCTACAG<br>TATTTACACACGGTATTG      | gacaatcgctatgtcggttaataCTCGAATG<br>AACAGTTTCTTAGCAGC             |
|              | Mut-ctr2-S<br>REBP1(1)  | agcatcacatcgactaggtTGCTAAACC<br>GGTAGCCGGC               | tagtgcatgtgatgctcgaAGCTAAACT<br>TGACTAAACTAACTAGCTTTCT           |
| <i>ctr2</i>  | Mut-ctr2-S<br>REBP1(2)  | atgccagatatggcttgatcAGCAACTCCA<br>CACAAAATGCC            | caagccatatctggcatgtcTGCTGAGGA<br>AAAGTCCAAAATCA                  |
| <i>atox1</i> | Mut-atox1-<br>NRF2(1)   | tcagtcagagtcggtacggctACAGTCAGT<br>TCAAAGTGACAGAGTTTG     | gtaccgactctgactgactTAGGGATGAT<br>CGTTAAATTCCCA                   |
|              | Mut-atox1-<br>NRF2(2)   | tcatgacaggctaggtgtccACAGGCAAC<br>GGAGCTTCAAC             | cacctagcctgtcatgattcGGTTCACAG<br>AAGCACAACTATAGCG                |
|              | Mut-atox1-<br>NRF2(3)   | gcttgtcagagtcatgtataaaCAGTTTCTT<br>CCATGACTGACGTTT       | acatgactctgacaagccACAGTGATCA<br>GCAGTTTCTTGTAGTG                 |
|              | Mut-atox1-<br>SREBP1(1) | gaaccgcgtgtcgtttcttCACACAGTATA<br>AATGATAACATATAATGTGTCA | aaaacgacacgcgggtcgtAACACTGCCT<br>AGGCGCTTGATT                    |
|              | Mut-atox1-<br>SREBP1(2) | agccgtcagaggtcgctactcgGTCAGCTG<br>GTACAACTACCAGGG        | tagcgacctctgacggctacAAGAAGACT<br>AACAGGGAAAAGCATAA               |

**Table S4.** Primers used for electrophoretic mobility-shift assay

| Primers                     |                         | Forward primer (5'-3')               | Reverse primer (5'-3')                |
|-----------------------------|-------------------------|--------------------------------------|---------------------------------------|
| <i>ctrl</i> -NRF2(1)        | Biotin-probe            | Biotin-GTAATGTGTGACAC<br>AGACAGCAGCA | Biotin-TGCTGCTGTCTGTGTC<br>ACACATTAC  |
|                             | Mutative-co<br>mpetitor | ACGGCTCTGACAGTCAG<br>TGATCATG        | CATGATCACTGACTGTCAGA<br>GCCGT         |
| <i>ctrl</i> -NRF2(2)        | Biotin-probe            | Biotin-TTGCAAAGTGACC<br>AATCAGTGTGAG | Biotin-CTCACACTGATTGGT<br>CACTTTGCAA  |
|                             | Mutative-co<br>mpetitor | CGATGGCTCAGAAGCCT<br>GACTGACT        | AGTCAGTCAGGCTTCTGAG<br>CCATCG         |
| <i>ctrl</i> -SREBP1<br>(1)  | Biotin-Probe            | Biotin-GAGAAAGATCACA<br>TGACCAGTTTAG | Biotin-CTAAACTGGTCATGT<br>GATCTTTCTC  |
|                             | Mutative-co<br>mpetitor | ACTCGCACCAGTGGTCAT<br>GACCGGT        | ACCGGTCATGACCACTGGT<br>GCGAGT         |
| <i>atox1</i> -NRF2(<br>2)   | Biotin-probe            | Biotin-CGAATCAGTCACA<br>AAGCAGTGTCCA | Biotin-TGGACACTGCTTTGT<br>GACTGATTCG  |
|                             | Mutative-co<br>mpetitor | ATGCGACTGACAGGCTA<br>GTCACTAG        | CTAGTGACTAGCCTGTCAGT<br>CGCAT         |
| <i>atox1</i> -NRF2(<br>3)   | Biotin-probe            | Biotin-TGGCTTGCTGAGA<br>CAGCATATAAAC | Biotin-GTTTATATGCTGTCTC<br>AGCAAGCCA  |
|                             | Mutative-co<br>mpetitor | CATAGGATCAGAGTCATG<br>CGGCCGA        | TCGGCCGCATGACTCTGATC<br>CTATG         |
| <i>atox1</i> -SREBP<br>1(1) | Biotin-probe            | Biotin-TTACGAAATTAAGT<br>GATTTTTCTTC | Biotin-GAAGAAAAATCACTT<br>AATTTTCGTAA |
|                             | Mutative-co<br>mpetitor | CGCATCGCCGCGTGTCGG<br>CCGAGCT        | AGCTCGGCCGACACGCGGC<br>GATGCG         |
| <i>atox1</i> -SREBP<br>1(2) | Biotin-probe            | Biotin-GTAGCCGGTCACAT<br>GATCTACTCGG | Biotin-CCGAGTAGATCATGT<br>GACCGGCTAC  |
|                             | Mutative-co<br>mpetitor | ACGTATATCAGAGGTCGT<br>GGACATA        | TATGTCCACGACCTCTGATA<br>TACGT         |

**Table S5.** Primers used for RT-qPCR analysis

| Genes                           | Forward primer (5'-3')   | Reverse primer (5'-3')    | Accession No. |
|---------------------------------|--------------------------|---------------------------|---------------|
| <i>ctr1</i>                     | TCAACACACCTGGAGAGA<br>TG | CACCTGGATGACGTGAA<br>GTA  | KY646156      |
| <i>ctr2</i>                     | CAAGGTGTGGAAGAACG<br>TTC | GAACAATGTGCAGTCCT<br>GTC  | KY646157      |
| <i>atox1</i>                    | TGACATGTGAAGGATGCT<br>CT | AGGACCAATATACGTGA<br>CAGT | KY660270      |
| <i><math>\beta</math>-actin</i> | GCACAGTAAAGGCGTTGT<br>GA | ACATCTGCTGGAAGGTG<br>GAC  | EU161066      |
| <i>elfa</i>                     | GTCTGGAGATGCTGCCAT<br>TG | AGCCTTCTTCTCAACGC<br>TCT  | KU886307      |
| <i>b2m</i>                      | GCTGATCTGCCATGTGAG<br>TG | TGTCTGACACTGCAGCT<br>GTA  | KP938520      |
| <i>hpri</i>                     | ATGCTTCTGACCTGGAAC<br>GT | TTGCGGTTTCAGTGCTTT<br>GAT | KP938523      |
| <i>rpl7</i>                     | GGCAAATGTACAGGAGC<br>GAG | GCCTTGTTGAGCTTGAC<br>GAA  | KP938522      |
| <i>ubce</i>                     | TCAAGAAGAGCCAGTGG<br>AGG | TAGGGGTAGTCGATGGG<br>GAA  | KP938524      |
| <i>18s rRNA</i>                 | AGCTCGTAGTTGGATCTC<br>GG | CGGGTATTCAGGCGAGT<br>TTG  | KP938527      |
| <i>tbp</i>                      | AGCAAAGAGTGAGGAGC<br>AGT | ACTGCTGATGGGTGAGA<br>ACA  | KP938525      |
| <i>gapdh</i>                    | TTTCAGCGAGAGAGACCC<br>AG | ATGACTCTCTTGGCACC<br>TCC  | KP938521      |
| <i>tuba</i>                     | TCAAAGCTGGAGTTCTCG<br>GT | AATGGCCTCGTTATCCA<br>CCA  | KP938526      |

```

TGTGGAGCGA CTTGTGTGTG GGTGAGAGAG TGCTTGTGAG AGTGTTTGTG TGTAAAGAGT TATGTGGAAA AGAGTGTGTG GAAGAGAGTA TTTGTGTGTG -1259
                                         KLF4
TGATAGAGAG AGTGCACACG TAAGTGTGTG CTTGAACAAA AGACTACACG ATTTATAGTT ATAGAGTTAT AGTTCATGTC GGCCATGTTT GTAGGCCGTG -1159
                                         MRE          MAC1
ATGTTCTCTG TGAAATTGAG TCAAACTGAT ATTTTAAAGT TAATCATTTT TTAGTTCTGT TTAATATTGT ATAGATGTCA TATTACCTGT AACTTGCAAA -1059
GTGACCAATC AGTGTGAGGA ACAGTGTGTG GGTGTGGTG AAGTAAATCC AGTTATGAAG CTGTTTGGAG TTGTTGAGAA GAAAACGGTG TTGTAGCAGA -959
NRF2          CREB1
GCAGGTATAA TTTATTCTCC CTGGTTACCA TACTGTAGTA AACCAGAACAT CGTGTTTATC ATCATATATT AAATAACTCA GATCCAGTCC CACACTCCAG -859
GTTAGCAGGT GTGTAATGTG TGACACAGAC AGCAGCATAA CAGGGCCGTG TTATTAAAC ATTTCCACA GAAGCAGTTT CAGTCATTCT GCTCATACTG -759
                                         NRF2          MAC1
TACATTTAAG TTGTGTGTGT TTTTTGACAC ATTTTATACA CTATCTCAGG GACCTGTGCG TAAGAACTG TTCATTCGAG TATTAC TTCA CGCAAT ATTG -659
                                         MAC1          STAT3          SREBP1
TCTGAACCTA CAGTATTAC ACACGGTATT GACGCCGCTC GGTCCGCGCT GTTTTTTGTG TACTGTCTTT TTTGTATTTT GTGTGTGTC TTGTAACCTT -559
                                         MRE
TTGTCTGAAC TGTCTTGTCT GTCTTGTCTT GCACGTCTCT GTCTTGCCCT GTTGCACCA GGTACACAG TTGCACCTTA TGTATCTAGG ACTACTTACT -459
ATGTCCTTAG CCTGTCTTT GTTTAATGTA GCACCTTGAT CCTGGAGAAA CGTCGTCTCA TTTCACCTTG TACTGTAACA GCTATATATG GTTAAAATGA -359
CAATAAAAGC TTCTTGACTT GACTTGAAAA AGGTTTCTCT GACAGGGGTC AGGAGTAGCG CGACACAGGC ACTGGTCTCA AATCGGTCAT TAACACTTTA -259
                                         AP1
CCAAGCAATA CTAAGTAATT AGAAATGTGT GATAATGATA TAGTCCCTGT CAGATGAATC CTTACATTCC TTCATCAATC AAATAAGGGA AATAAGAGAA -159
AGGAAATAAG AATAGAGTTA CATCGTCTGG CTTAAT CTCA GCCCAGGGA GGGAGAAAG TCACATGAC AGTTTAGTCA CGAGGGATCG TTTTTTTTTT -59
                                         CCAAT-box  SREBP1  SP1          SREBP1
TTAAAGGTCA CCCACACACA AGTCGCTCCA CATCTGCACA CACCCAAGAG CCAAGTTCA TTTCTCGGTG TAAAGTACCG CTTACGTGC GCGCCGCTAG +41
TATA-box          MRE          TSS
CCGTCAGGAC CTCGTC +57

```

**Figure S1.** Nucleotide sequence of yellow catfish *ctr1* promoter. Numbers are relative to the transcription start site (TSS) (+1). The putative transcription factor binding sites are underlined. The highlighted sequences show putative transcription factor binding sites of NRF2 and SREBP1.

```

CCCAACGCA ATTAAAAATG TTGAGTTAG TGTGAAAAA CCCTTAAGTT TGACATTTTA TCTTTCTCC TGTAAACAC TATTGTAATG CTGCGTTCAT -1742
GCTACCTAGT AACAGGAGC AGGAGTTATA AACTCAAAAT AGCAAGGAGT ATAGCTGGTG TATTAGATCG AACTAAATAC TGCTGTGATA ATAACGTATC -1642
TAAAACGAAT ACTGTTAGAA ACTAATTTAA AAGTAGAGAA GGGGACTTT AGTCCATTTT TCACTGGGTG TGACCAAGAG GATTTGACGT CACTCTGTAC -1542
                                     KLF4                                     MAC1
TCAGGGAAGG AGCTGGTAGC GCCAATGACT ACCTCAAGAA GCTAGCAGGT CAAAATTACT AGTTAAAGTG AGGTCCACT GTGTGTGTA GTGTGTGTGT -1442
TGTTTTTTTT CAGTAATAGC GCAATTACAT GTTCGCCTCG AAAACAAGAG CACAAAGAAC ATCACCTTGT GATGTCAGTG ACATACTTCT CACAGGAATA -1342
                                     MAC1                                     CREB1
ACAAATGTAC ATCACTAAAA ATGAATTAAA CCCCAAATAG ATGGAAGACA ACATGTTTTT TTTTCAATA TATATTTAAA GCTGTTCAAT CAGAGGCTGG -1242
                                     SP1
ATGTTAATTA ATGTGTTTTT ATTAACATAT TTTACTTCTT GATACTGCCA TGGTCTATA GCTGTGAACA GACTGATGAG GCTCATGGGG CTCAGTTTGT -1142
AATCGAATGA TACTAAATAA AAAATAGTGA TGGATACAAA AGTACCTGAT TTGGACTTT TCCTCAGCAG ACATCATCTG GCCATTTTGA TCAGCAATCT -1042
                                     PPARy                                     SREBP1
CACACAAAAT GCCACTAAGT AGCACACAGC GCAGCAGCAC CATAACGAG CAGCTGAAGC AGGGACTCTT CTCTGCTCTT ACACCTATTT TACCCATTAA -942
AACTAGATTT TTCCCCCTAC TGATCGTGAA AGGAAAACGA CTTTTTTTCC TTCCAAGAGA TCCTGAACGT TCTTTAATTA AAGTACACGT AAACAGTTAA -842
                                     STAT4
AGCATGATAG TAAACCTCCT CCTGTCAGTC AAGGAACAAT TAATAACAA CACGGAATA AACACCACA AGCTTTGAAT AGCCAAATAT TTTAAACGAC -742
TCAACAATTT AGTGTAATTT ACGACAGSTA GATAACAGT ATATCTAACC TCGCCTAAGC TAAACAGAAA GCTAGTTAGT TTAGTCAAGT TTAGCTTCGA -642
GCATGACGT TAGCTTAGTT GCTAAACCGG TAGCCGGCTA AGCTAATAC TTCATAGCTA ACACAAGAAA AGAGAAAAGT CCTTCTTGGA TAAATATTC -542
SREBP1
AGAAAATGTT CCCTGGAGGA GTCAAATTGC CGAAATACTC CATTTCACAC CGTCTCAGA TGTACATATT TTCGTGAAGG CTCATCTAAA CCCAGCGACT -442
STAT3
CCTCGCCGCC TCCTGCTTAA TCAAAACACC AAAATATTCA CATATTTACA TTGACGCCAT CTTTCTTTAC ACTCGACAA GCCGGAAGTA GAATTAATAA -342
SP1                                     AP1
TAATATATAT TTTTATGATT TTTAAACACA CGATAAAGG CATTTTCATG TCACATTACA TTTCATGTCA CATTTTATA TTATTATGTT ATATAAAG -242
ATTTATATAT ATAAAAAAA TAAAAAGTA CTGTATGAGT AACCAATGAC AGCTCAAAAT TGAGTCAGTG TGACGTATTT TAACGGACGA ATCCAAATAT -142
                                     CCAAT-box                                     CREB1
CACTTTAGTG CACTAGGTAG GGTACAGGAG AAGCTTTTGG TTATTCATA CCTGGTAGAG CTAGCTAGG GAGTAGGAA CAATTTGGTT TTTACTGCAT -42
PPARy
TTGCACGTTT ACTTATATAG CTTGTTTCCC TTTGTGAAC CTAGGAG CAGGAGGACA AAGCTGTAGC TGGATTATAT AATAA +43
TATA-box                                     TSS

```

**Figure S2.** Nucleotide sequence of yellow catfish *ctr2* promoter. Numbers are relative to the transcription start site (TSS) (+1). The putative transcription factor binding sites are underlined. The highlighted sequences show putative transcription factor binding sites of SREBP1.

TACAAATATT AACCAAGTATT TATATGACAG TGGGTGGGT CCCTGGTGGT CCAATAGCAG GATCTCACTG CCACAGTCAG GGTTCGATTC CCAGGCAGGG -1725  
 SP1  
 AACAACTCA GACACTGAGG GGTTCATTGC TGGTCCTTAG GAAGGGAATC CAGCATAAAA CCTGCGCCAA ATTAAATATA GGTGGATCGA ATGATTGCT -1625  
 AP1  
 GTGGTGAAAG AGGCAAGAGC AATATTCATA TGACAGAAAG TTGGATCAAA ATATATCACA AATCTTATCT AGTATTTTCA AATAAAAAACA GCTCTGTAT -1525  
 MAC1  
 CAATGCATGA CTTCCCTAAA TGACTCTAAG CATTTACTGA AGGCTATTTA AACATCTACA ATTAACCTGT TGAACATATG GATATACATG TCATCATGAG -1425  
 CREB1  
 TGATTACAGT ACAATTGTGT TGCTTTTTTC AGGGCGTAAA AGGCATACGT TAACCATGAA ATTGTGCAAG TGAAATTAAA AATTACATAT GTAAAAATATG -1325  
 TTATGCAACA GTTAAAAAAT ATGAGGTTTT TTTTGTGTTT GTTTTTTGCC ATGCACTACA AGAAACTGCT GATCACTGTG GCTTCTGAG ACAGCATATA -1225  
 NRF2  
 AACAGTTTCT TCCATGACTG ACGTTTTTCG CCATGACATA ACTATGTTTA ATGAAAAAAA TCTTCTCTTT CATTCGAAGG ATGATGAATC CAACGCTTTC -1125  
 CREB1  
 TTTACAGTGA AAACAACAGC ACATTAACAC ATTCAGATCA TTGACCTGCA TATGGTTTAT GTTCTGTGT TTTCAACAT CTACCATCTA CAGTTATTAT -1025  
 TATTATACTA TTATTATTAG TTTGAATACG TTCCACAAA ATAATGAGTC GCTCTTATTT CTGAAGGCA TCAGTAAATA AACCGGATCT TACTGTGAAA -925  
 AP1  
 CCTGCATTGA TTATATCAGA CTTACCAAGG CCGAGAGCAG CTGTAGTCCA ATCTTATTAT GTAACAGTCT TCAAAATATG CAGAAAACTG CACATTTTTA -825  
 CATGCATTGT TAATCAGATG TTGTTTTATT AAAACCCCTGA ACGCTGACCA TCTCATTCCA CTACGAGCCC TTGTCTTTTC CTCCTTATGC TTTTCCTGTT -725  
 KLF4  
 TAGTCTTCTT GTAGCGGTC ACATGAT TTA CTCGGTCAGC TGTGTAACCT ACCAGGGAGC GTCTGTGTAA AACCTGTCAG CTAGTTCAGC GTGCAGATT -625  
 SREBP1  
 GTTGACTATA TGCTTCCAAA ATACTTCGGA ACTCAAGTGT TTCAGTGGT TTTGGATAAT AAAAAATAAA ACGCAAACGT GTAATGCTGT ACAAATGTGT -525  
 GACAACAACA ACAACAACA AAAATGAGTT AAAATGACAT TTATAGTGAA TTGTTTTTAT TGAATCGACT CGTAAATATG GAGGATTGTG TTGTGGTTGT -425  
 TGTGTTTTGCC AGTGAAACTA TTTAGAACAT GTTCTTATAC GCAAACAAAC CGCTGTTTCC GCTATAGTTT GTGCTTCTGT GAACCGAATC GTACACAAAG -325  
 AP1 NRF2  
CGSTGCCAC AGGCAACGGA GCTTCAACGT CATTGGTCAC GTGTTTATG CAGAACGAAT CAAGCGCCTA GGCAGTGTTA CGAATTAAG TGATTTTCT -225  
 CCAAT-box SP1 SREBP1  
 TCACACAGTA TAAATGATAA CATATAATGT GTCAATTTAT GCCTGAAAAAT ATCTAAAATT ACCGTTTCATC AATAATACTT ATATAATAAG CCTAATATTC -125  
 STAT3 TATA-box  
 ATGTAAACTA AAACATGTTT CTGTTTTTCAT AAACGCTTTT GAAAAGTTCT GGGAATTTAA CGATCATCCC TAAGTCAG CACTGAGTCAC CGGCTACAGT -25  
 STAT4 NRF2  
 CAGTTCAAAG TGACAGAGTT TGTTCATCAT TTGTGTGTTT TAGCCGAGTG TCTTTTTTTC TCTTCTT +43  
 TSS

**Figure S3.** Nucleotide sequence of yellow catfish *atox1* promoter. Numbers are relative to the transcription start site (TSS) (+1). The putative transcription factor binding sites are underlined. The highlighted sequences show putative transcription factor binding sites of NRF2 and SREBP1.
